# Supplementary material for: Validity and Absolute Reliability of the Cobb Angle in Idiopathic Scoliosis with TraumaMeter Software
Source: MDPI journal article supplement (doi:10.3390/ijerph19084655), 2022-04-12
Supplement: s1 [file s1]

|     | E11  | E12  | E13  | E21  | E22  | E23  | E31  | E32  | E33  | E41  | E42  | E43  | N11  | N12  | N13  | N21  | N22  | N23  | N31  | N32  | N33  | N41  | N42  | N43  |
|-----|------|------|------|------|------|------|------|------|------|------|------|------|------|------|------|------|------|------|------|------|------|------|------|------|
| 1a  | 12.4 | 12.0 | 12.8 | 13.1 | 13.3 | 13.4 | 12.2 | 12.3 | 12.8 | 11.1 | 11.8 | 13.4 | 9.3  | 11.4 | 10.9 | 15.2 | 13.4 | 13.9 | 14.7 | 12.4 | 13.5 | 12.3 | 11.5 | 12.7 |
| 2a  | 15.8 | 14.2 | 15.3 | 18.0 | 17.1 | 16.9 | 16.1 | 17.8 | 16.7 | 19.7 | 19.4 | 20.0 | 16.2 | 16.9 | 18.5 | 17.9 | 16.9 | 18.4 | 17.1 | 16.8 | 15.7 | 17.3 | 15.3 | 18.1 |
| 3a  | 18.9 | 20.1 | 20.7 | 19.1 | 19.6 | 19.8 | 21.5 | 20.7 | 20.4 | 19.6 | 22.4 | 20.4 | 21.5 | 21.9 | 18.5 | 22.4 | 22.6 | 20.9 | 20.4 | 19.2 | 20.6 | 17.3 | 20.0 | 18.2 |
| 4a  | 30.5 | 29.9 | 31.2 | 32.2 | 28.9 | 31.7 | 36.7 | 36.6 | 34.3 | 33.2 | 32.3 | 32.8 | 32.7 | 30.5 | 29.1 | 32.8 | 31.3 | 32.9 | 34.3 | 35.8 | 32.2 | 29.7 | 33.5 | 26.9 |
| 5a  | 32.3 | 28.3 | 28.8 | 31.4 | 30.5 | 31.1 | 31.9 | 32.4 | 32.0 | 30.8 | 34.5 | 32.9 | 31.9 | 32.1 | 30.5 | 31.4 | 30.8 | 29.7 | 30.6 | 31.1 | 32.1 | 31.9 | 33.1 | 28.8 |
| 6a  | 43.1 | 41.6 | 42.1 | 40.2 | 46.1 | 45.4 | 46.2 | 47.8 | 47.6 | 50.3 | 48.8 | 51.3 | 41.3 | 45.7 | 49.3 | 45.4 | 44.4 | 41.7 | 44.4 | 43.7 | 44.9 | 46.7 | 42.5 | 42.4 |
| 7a  | 24.6 | 23.7 | 25.6 | 24.9 | 23.9 | 24.3 | 24.2 | 24.6 | 24.2 | 20.9 | 26.1 | 27.0 | 25.4 | 25.8 | 23.8 | 24.1 | 25.3 | 25.6 | 24.1 | 23.8 | 25.0 | 24.0 | 25.6 | 21.6 |
| 8a  | 46.6 | 44.6 | 47.4 | 45.2 | 44.4 | 44.9 | 44.6 | 44.3 | 45.2 | 43.7 | 46.1 | 46.1 | 43.8 | 45.8 | 47.1 | 45.9 | 47.4 | 44.3 | 42.0 | 43.6 | 44.8 | 44.2 | 47.9 | 42.0 |
| 9a  | 36.2 | 36.3 | 37.0 | 36.1 | 36.5 | 36.2 | 41.1 | 40.4 | 40.1 | 37.0 | 40.4 | 42.4 | 40.9 | 36.6 | 36.0 | 37.4 | 38.0 | 40.0 | 36.6 | 39.4 | 38.1 | 37.6 | 37.0 | 25.4 |
| 10a | 19.3 | 16.5 | 19.2 | 20.2 | 17.9 | 19.9 | 18.6 | 17.3 | 17.2 | 18.3 | 19.9 | 20.7 | 18.0 | 19.8 | 18.9 | 19.2 | 18.0 | 18.4 | 18.4 | 17.1 | 18.7 | 18.5 | 19.1 | 18.3 |
| 11a | 25.7 | 26.2 | 24.5 | 28.9 | 28.2 | 26.3 | 27.6 | 27.6 | 27.2 | 24.5 | 26.0 | 27.1 | 28.5 | 26.4 | 25.9 | 28.0 | 31.9 | 28.1 | 27.1 | 27.2 | 27.0 | 26.9 | 28.2 | 27.4 |
| 12a | 34.6 | 34.7 | 35.1 | 11.5 | 36.5 | 37.7 | 39.7 | 39.2 | 38.4 | 36.2 | 40.7 | 39.5 | 35.3 | 36.4 | 37.5 | 38.2 | 37.9 | 37.6 | 35.0 | 36.0 | 37.2 | 35.5 | 38.2 | 38.4 |
| 13a | 54.3 | 55.9 | 54.8 | 55.8 | 55.4 | 55.5 | 55.4 | 55.4 | 55.9 | 57.0 | 56.8 | 58.2 | 55.7 | 52.4 | 53.9 | 57.3 | 56.3 | 55.7 | 55.8 | 56.9 | 57.7 | 57.4 | 55.7 | 55.9 |
| 14a | 30.4 | 29.9 | 30.9 | 29.7 | 29.1 | 30.2 | 29.0 | 29.5 | 29.2 | 31.8 | 30.8 | 26.7 | 29.5 | 29.5 | 31.1 | 33.0 | 31.0 | 29.0 | 26.6 | 28.9 | 35.4 | 30.6 | 30.2 | 31.4 |
| 15a | 65.0 | 62.8 | 66.0 | 65.9 | 64.7 | 67.1 | 66.8 | 66.8 | 65.8 | 65.3 | 69.2 | 67.3 | 67.2 | 60.8 | 68.8 | 70.4 | 68.6 | 71.2 | 67.5 | 65.5 | 65.9 | 58.6 | 61.8 | 66.6 |
| 16a | 20.0 | 18.7 | 20.6 | 19.8 | 19.1 | 20.4 | 18.8 | 19.4 | 19.9 | 25.3 | 21.0 | 20.5 | 25.2 | 21.0 | 20.4 | 21.0 | 21.3 | 22.7 | 23.7 | 21.3 | 19.7 | 19.7 | 22.1 | 20.8 |
| 17a | 55.6 | 55.7 | 56.1 | 56.5 | 57.4 | 58.9 | 55.6 | 55.4 | 55.1 | 59.1 | 56.5 | 59.3 | 53.7 | 56.9 | 52.3 | 56.0 | 56.8 | 56.6 | 57.0 | 56.9 | 56.4 | 56.5 | 59.2 | 56.6 |
| 18a | 56.5 | 54.1 | 54.2 | 56.3 | 56.1 | 54.6 | 57.7 | 58.6 | 57.7 | 57.7 | 60.7 | 60.0 | 60.7 | 50.1 | 53.6 | 55.5 | 57.7 | 56.3 | 58.3 | 56.4 | 55.3 | 57.6 | 56.4 | 59.0 |
| 19a | 35.8 | 35.9 | 34.9 | 38.3 | 37.3 | 38.7 | 37.4 | 37.7 | 38.0 | 37.7 | 39.9 | 42.5 | 36.0 | 38.3 | 40.5 | 39.3 | 38.4 | 37.8 | 35.4 | 38.1 | 38.1 | 38.0 | 35.9 | 37.4 |
| 20a | 13.7 | 13.7 | 15.1 | 14.6 | 16.0 | 16.6 | 17.7 | 17.1 | 17.4 | 18.7 | 18.2 | 16.9 | 14.6 | 14.5 | 16.4 | 19.2 | 16.3 | 15.9 | 14.6 | 15.6 | 17.5 | 13.6 | 14.4 | 13.3 |
| 21a | 55.5 | 57.7 | 54.7 | 53.9 | 59.0 | 53.4 | 53.0 | 52.7 | 52.9 | 55.6 | 54.8 | 56.4 | 54.7 | 56.8 | 57.7 | 66.7 | 63.2 | 64.3 | 57.4 | 52.9 | 54.4 | 55.8 | 50.8 | 51.3 |
| 3b  | 14.5 | 15.0 | 15.6 | 18.7 | 15.8 | 16.6 | 17.0 | 16.4 | 16.5 | 16.9 | 18.6 | 17.6 | 13.7 | 18.6 | 18.3 | 16.1 | 17.4 | 18.4 | 16.1 | 17.1 | 18.6 | 19.0 | 16.2 | 16.4 |
| 4b  | 25.4 | 23.5 | 27.3 | 25.7 | 26.4 | 25.0 | 23.8 | 23.1 | 23.4 | 27.4 | 26.3 | 26.1 | 23.2 | 24.4 | 23.8 | 26.0 | 27.1 | 27.1 | 27.5 | 24.8 | 25.4 | 27.5 | 24.8 | 24.6 |
| 6b  | 30.6 | 28.9 | 30.8 | 28.9 | 29.3 | 31.3 | 27.2 | 26.1 | 26.3 | 30.1 | 31.9 | 33.5 | 28.5 | 32.8 | 36.5 | 30.0 | 30.1 | 29.8 | 30.2 | 31.6 | 31.1 | 29.6 | 29.3 | 28.5 |
| 7b  | 16.4 | 18.7 | 17.7 | 14.7 | 15.5 | 17.4 | 16.6 | 16.8 | 16.8 | 15.8 | 16.4 | 17.2 | 17.0 | 18.6 | 18.0 | 17.3 | 18.3 | 18.4 | 15.6 | 17.8 | 16.2 | 17.5 | 16.6 | 16.1 |
| 10b | 15.6 | 15.2 | 17.7 | 16.8 | 17.9 | 18.6 | 15.7 | 15.8 | 15.6 | 15.8 | 16.5 | 17.7 | 17.8 | 16.5 | 17.4 | 14.7 | 17.3 | 17.6 | 17.8 | 16.4 | 17.1 | 15.0 | 17.2 | 15.9 |
| 11b | 23.7 | 23.7 | 23.1 | 25.1 | 26.3 | 25.8 | 26.1 | 26.6 | 26.6 | 24.5 | 27.2 | 26.8 | 21.7 | 21.7 | 21.7 | 25.0 | 26.4 | 27.3 | 27.0 | 26.4 | 26.1 | 26.5 | 24.5 | 23.9 |
| 12b | 33.1 | 33.3 | 33.2 | 7.5  | 33.6 | 35.6 | 33.1 | 33.8 | 33.0 | 34.6 | 35.2 | 33.0 | 33.5 | 33.9 | 30.1 | 32.0 | 34.8 | 34.2 | 32.2 | 31.3 | 33.3 | 32.0 | 32.7 | 34.0 |
| 13b | 35.4 | 35.3 | 35.9 | 35.1 | 35.0 | 36.8 | 38.3 | 37.4 | 37.5 | 34.7 | 36.4 | 34.6 | 36.7 | 35.1 | 38.0 | 36.5 | 36.8 | 34.2 | 33.1 | 34.3 | 32.3 | 32.9 | 38.3 | 34.4 |
| 14b | 26.4 | 25.1 | 26.5 | 26.6 | 26.7 | 28.8 | 27.7 | 27.7 | 27.6 | 27.2 | 27.8 | 28.9 | 28.6 | 26.4 | 27.6 | 27.1 | 26.7 | 27.2 | 26.3 | 28.5 | 26.2 | 30.6 | 30.3 | 29.6 |
| 15b | 50.8 | 50.5 | 50.7 | 46.2 | 46.1 | 45.1 | 49.9 | 50.2 | 50.4 | 44.8 | 48.7 | 42.2 | 48.6 | 41.7 | 49.1 | 49.3 | 51.8 | 51.1 | 50.1 | 44.9 | 48.6 | 44.9 | 48.8 | 50.2 |
| 16b | 18.8 | 18.3 | 19.4 | 20.1 | 18.4 | 20.2 | 18.7 | 18.3 | 18.9 | 19.7 | 19.1 | 18.3 | 20.3 | 20.7 | 17.1 | 19.7 | 20.6 | 19.6 | 20.2 | 15.8 | 17.2 | 13.4 | 17.0 | 15.9 |
| 17b | 39.2 | 36.8 | 37.0 | 37.6 | 36.2 | 37.3 | 39.3 | 39.0 | 38.9 | 39.5 | 39.6 | 40.1 | 37.5 | 36.4 | 35.4 | 38.8 | 39.4 | 39.3 | 39.3 | 39.1 | 33.1 | 38.1 | 32.4 | 33.4 |
| 18b | 40.3 | 39.3 | 38.8 | 38.1 | 40.0 | 37.7 | 36.2 | 36.8 | 36.4 | 41.1 | 39.1 | 42.3 | 32.9 | 36.5 | 38.3 | 38.4 | 38.2 | 38.5 | 35.9 | 38.1 | 38.1 | 37.1 | 39.8 | 29.5 |
| 21b | 45.4 | 47.0 | 46.8 | 46.7 | 48.5 | 48.4 | 52.4 | 52.1 | 52.4 | 50.8 | 49.8 | 50.6 | 47.4 | 47.4 | 50.7 | 46.3 | 48.8 | 50.2 | 45.8 | 49.7 | 49.7 | 47.7 | 46.2 | 48.1 |

**Table S1a.** Cobb angle values (in degrees) of each curve obtained by each observer and in each series of measurements, with the software. Xa is the primary curve, and Xb is the secondary or compensating curve of the RX number X (X1 to X21). The first digit of the column descriptors corresponds to the observer and the second to the measurement series (e.g., E21 is equivalent to the first measurement of the “Expert observer” number 2). E, a measurement obtained by the “Expert observer”; N, the measurement from the “Novel observer”.
