# Supplementary material for: Validity and Absolute Reliability of the Cobb Angle in Idiopathic Scoliosis with TraumaMeter Software
Source: MDPI journal article supplement (doi:10.3390/ijerph19084655), 2022-04-12
Supplement: s1 [file s1]

|            | E11  | E12  | E13  | E21  | E22  | E23  | E31  | E32  | E33  | E41  | E42  | E43  | N11  | N12  | N13  | N21  | N22  | N23  | N31  | N32  | N33  | N41  | N42  | N43  |
|------------|------|------|------|------|------|------|------|------|------|------|------|------|------|------|------|------|------|------|------|------|------|------|------|------|
| <b>1a</b>  | 13.0 | 14.0 | 16.0 | 10.0 | 13.0 | 11.0 | 12.5 | 15.0 | 14.0 | 15.0 | 20.0 | 17.0 | 15.0 | 19.0 | 12.0 | 13.0 | 18.0 | 16.0 | 13.0 | 15.0 | 12.0 | 15.0 | 13.0 | 14.0 |
| <b>2a</b>  | 18.0 | 14.0 | 17.0 | 18.0 | 16.0 | 17.0 | 17.0 | 17.0 | 17.0 | 17.0 | 19.0 | 21.0 | 14.0 | 15.0 | 15.0 | 16.0 | 19.0 | 16.0 | 18.0 | 16.0 | 19.0 | 18.0 | 19.0 | 16.0 |
| <b>3a</b>  | 20.0 | 23.0 | 19.0 | 20.0 | 22.0 | 20.0 | 20.5 | 20.0 | 20.0 | 22.0 | 25.0 | 21.0 | 25.0 | 20.0 | 19.0 | 20.0 | 20.0 | 21.0 | 18.0 | 19.0 | 20.0 | 20.0 | 19.0 | 19.0 |
| <b>4a</b>  | 28.0 | 28.0 | 28.0 | 33.0 | 35.0 | 34.0 | 34.0 | 32.0 | 30.0 | 29.0 | 34.0 | 33.0 | 28.0 | 20.0 | 26.0 | 37.0 | 30.0 | 30.0 | 28.0 | 33.0 | 29.0 | 30.0 | 32.0 | 31.0 |
| <b>5a</b>  | 27.0 | 33.0 | 29.0 | 32.0 | 33.0 | 32.0 | 29.0 | 31.0 | 31.0 | 29.0 | 33.0 | 29.0 | 29.0 | 30.0 | 31.0 | 30.0 | 32.0 | 26.0 | 29.0 | 27.0 | 30.0 | 30.0 | 34.0 | 29.0 |
| <b>6a</b>  | 43.0 | 42.0 | 44.0 | 48.0 | 46.0 | 47.0 | 45.0 | 44.0 | 44.0 | 47.0 | 48.0 | 45.0 | 49.0 | 41.0 | 32.0 | 48.0 | 45.0 | 48.0 | 39.0 | 42.0 | 40.0 | 44.0 | 44.0 | 41.0 |
| <b>7a</b>  | 21.0 | 24.0 | 25.0 | 24.0 | 25.0 | 27.0 | 24.5 | 26.0 | 24.0 | 26.0 | 25.0 | 26.0 | 22.0 | 23.0 | 22.0 | 26.0 | 21.0 | 28.0 | 23.0 | 26.0 | 25.0 | 23.0 | 27.0 | 24.0 |
| <b>8a</b>  | 45.0 | 43.0 | 43.0 | 45.0 | 45.0 | 46.0 | 47.0 | 47.0 | 43.0 | 47.0 | 47.0 | 45.0 | 53.0 | 42.0 | 47.0 | 45.0 | 39.0 | 42.0 | 44.0 | 42.0 | 46.0 | 48.0 | 47.0 | 46.0 |
| <b>9a</b>  | 38.0 | 36.0 | 41.0 | 38.0 | 39.0 | 39.0 | 37.0 | 36.0 | 37.0 | 36.0 | 36.0 | 38.0 | 35.0 | 35.0 | 37.0 | 34.0 | 36.0 | 39.0 | 36.0 | 36.0 | 36.0 | 36.0 | 37.0 | 38.0 |
| <b>10a</b> | 19.0 | 16.0 | 21.0 | 17.0 | 23.0 | 20.0 | 21.0 | 21.0 | 19.0 | 22.0 | 21.0 | 21.0 | 18.0 | 18.0 | 15.0 | 23.0 | 20.0 | 20.0 | 16.0 | 15.0 | 17.0 | 18.0 | 16.0 | 19.0 |
| <b>11a</b> | 28.0 | 28.0 | 27.0 | 26.0 | 33.0 | 30.0 | 27.0 | 25.0 | 26.0 | 28.0 | 30.0 | 26.0 | 25.0 | 22.0 | 29.0 | 28.0 | 29.0 | 27.0 | 24.0 | 24.0 | 26.0 | 27.0 | 28.0 | 26.0 |
| <b>12a</b> | 35.0 | 34.0 | 36.0 | 38.0 | 38.0 | 39.0 | 36.0 | 37.0 | 35.0 | 38.0 | 35.0 | 37.0 | 34.0 | 36.0 | 37.0 | 37.0 | 34.0 | 35.0 | 35.0 | 34.0 | 35.0 | 35.0 | 36.0 | 35.0 |
| <b>13a</b> | 58.0 | 57.0 | 59.0 | 59.0 | 60.0 | 58.0 | 55.0 | 55.0 | 55.0 | 53.0 | 57.0 | 58.0 | 58.0 | 56.0 | 53.0 | 54.0 | 58.0 | 54.0 | 57.0 | 57.0 | 57.0 | 55.0 | 55.0 | 59.0 |
| <b>14a</b> | 29.5 | 32.0 | 29.0 | 30.0 | 31.0 | 32.0 | 31.0 | 31.0 | 30.0 | 31.0 | 31.0 | 33.0 | 29.0 | 27.0 | 26.0 | 30.0 | 30.0 | 35.0 | 30.0 | 27.0 | 29.0 | 30.0 | 31.0 | 29.0 |
| <b>15a</b> | 66.0 | 66.0 | 70.0 | 71.0 | 70.0 | 67.0 | 66.0 | 68.0 | 71.0 | 66.0 | 67.0 | 65.0 | 76.0 | 69.0 | 65.0 | 58.0 | 60.0 | 64.0 | 57.0 | 63.0 | 67.0 | 68.0 | 71.0 | 67.0 |
| <b>16a</b> | 24.0 | 20.0 | 25.0 | 18.0 | 20.0 | 20.0 | 25.0 | 24.0 | 24.0 | 21.0 | 25.0 | 26.0 | 20.0 | 21.0 | 22.0 | 24.0 | 19.0 | 21.0 | 20.0 | 26.0 | 19.0 | 22.0 | 25.0 | 24.0 |
| <b>17a</b> | 59.0 | 58.0 | 59.0 | 58.0 | 58.0 | 59.0 | 55.0 | 57.0 | 55.0 | 62.0 | 58.0 | 58.0 | 53.0 | 42.0 | 56.0 | 57.0 | 55.0 | 55.0 | 56.0 | 55.0 | 57.0 | 58.0 | 56.0 | 59.0 |
| <b>18a</b> | 55.0 | 55.0 | 58.0 | 59.0 | 60.0 | 60.0 | 55.0 | 55.0 | 54.0 | 54.0 | 52.0 | 54.0 | 57.0 | 57.0 | 49.0 | 59.0 | 60.0 | 55.0 | 53.0 | 55.0 | 51.0 | 59.0 | 58.0 | 59.0 |
| <b>19a</b> | 36.0 | 40.0 | 36.0 | 36.0 | 40.0 | 36.0 | 40.0 | 40.0 | 40.0 | 39.0 | 39.0 | 37.0 | 39.0 | 36.0 | 36.0 | 42.0 | 43.0 | 43.0 | 38.0 | 38.0 | 39.0 | 27.0 | 40.0 | 40.0 |
| <b>20a</b> | 14.0 | 18.0 | 15.0 | 14.0 | 15.0 | 13.0 | 14.0 | 15.0 | 15.0 | 17.0 | 17.0 | 18.0 | 12.0 | 15.0 | 18.0 | 17.0 | 17.0 | 16.0 | 15.0 | 15.0 | 16.0 | 15.0 | 18.0 | 18.0 |
| <b>21a</b> | 62.0 | 59.0 | 55.0 | 63.0 | 63.0 | 57.0 | 63.0 | 66.0 | 65.0 | 64.0 | 64.0 | 59.0 | 75.0 | 66.0 | 65.0 | 60.0 | 59.0 | 59.0 | 61.0 | 61.0 | 64.0 | 66.0 | 66.0 | 64.0 |
| <b>3b</b>  | 19.0 | 13.0 | 17.0 | 18.0 | 18.0 | 18.0 | 18.0 | 19.0 | 19.0 | 18.0 | 20.0 | 18.0 | 20.0 | 17.0 | 16.0 | 19.0 | 20.0 | 18.0 | 17.0 | 18.0 | 17.0 | 18.0 | 17.0 | 17.0 |
| <b>4b</b>  | 20.0 | 22.0 | 24.0 | 26.0 | 28.0 | 26.0 | 28.0 | 25.0 | 26.0 | 23.0 | 30.0 | 25.0 | 23.0 | 24.0 | 25.0 | 28.0 | 27.0 | 24.0 | 23.0 | 25.0 | 24.0 | 28.0 | 22.0 | 26.0 |
| <b>6b</b>  | 29.0 | 30.0 | 29.0 | 33.0 | 31.0 | 31.0 | 28.0 | 29.0 | 33.0 | 32.0 | 32.0 | 33.0 | 25.0 | 32.0 | 19.0 | 30.0 | 33.0 | 34.0 | 30.0 | 30.0 | 29.0 | 28.0 | 31.0 | 29.0 |
| <b>7b</b>  | 17.0 | 17.0 | 19.0 | 16.0 | 16.0 | 19.0 | 16.5 | 18.0 | 16.0 | 16.0 | 18.0 | 16.0 | 14.0 | 15.0 | 16.0 | 21.0 | 15.0 | 15.0 | 16.0 | 24.0 | 16.0 | 17.0 | 26.0 | 17.0 |
| <b>10b</b> | 17.0 | 15.0 | 17.0 | 17.0 | 18.0 | 18.0 | 16.0 | 15.0 | 17.0 | 16.0 | 20.0 | 18.0 | 15.0 | 16.0 | 15.0 | 15.0 | 18.0 | 17.0 | 14.0 | 14.0 | 16.0 | 17.0 | 16.0 | 15.0 |
| <b>11b</b> | 25.0 | 25.0 | 23.0 | 24.0 | 24.0 | 26.0 | 23.0 | 24.0 | 24.0 | 25.0 | 27.0 | 24.0 | 24.0 | 20.0 | 26.0 | 25.0 | 27.0 | 22.0 | 22.0 | 23.0 | 25.0 | 25.0 | 27.0 | 16.0 |
| <b>12b</b> | 33.0 | 33.0 | 35.0 | 35.0 | 33.0 | 34.0 | 32.0 | 32.0 | 32.0 | 33.0 | 29.0 | 34.0 | 31.0 | 33.0 | 27.0 | 34.0 | 32.0 | 33.0 | 33.0 | 30.0 | 34.0 | 34.0 | 35.0 | 31.0 |
| <b>13b</b> | 34.0 | 34.0 | 31.0 | 38.0 | 39.0 | 40.0 | 34.0 | 36.0 | 38.0 | 39.0 | 40.0 | 38.0 | 37.0 | 33.0 | 36.0 | 35.0 | 40.0 | 38.0 | 38.0 | 36.0 | 37.0 | 36.0 | 37.0 | 36.0 |
| <b>14b</b> | 28.0 | 28.0 | 27.0 | 25.0 | 28.0 | 25.0 | 26.0 | 28.0 | 26.0 | 26.0 | 27.0 | 28.0 | 25.0 | 20.0 | 20.0 | 29.0 | 29.0 | 30.0 | 24.0 | 22.0 | 24.0 | 28.0 | 25.0 | 25.0 |
| <b>15b</b> | 51.0 | 51.0 | 45.0 | 46.0 | 50.0 | 52.0 | 49.0 | 51.0 | 50.0 | 48.0 | 44.0 | 44.0 | 45.0 | 51.0 | 46.0 | 50.0 | 46.0 | 45.0 | 44.0 | 44.0 | 41.0 | 45.0 | 46.0 | 45.0 |
| <b>16b</b> | 16.0 | 16.0 | 19.0 | 16.0 | 17.0 | 20.0 | 19.0 | 19.0 | 19.0 | 18.0 | 19.0 | 18.0 | 19.0 | 14.0 | 15.0 | 18.0 | 12.0 | 15.0 | 17.0 | 17.0 | 18.0 | 19.0 | 35.0 | 22.0 |
| <b>17b</b> | 39.0 | 40.0 | 40.0 | 40.0 | 40.0 | 40.0 | 39.0 | 39.0 | 39.0 | 40.0 | 37.0 | 39.0 | 37.0 | 35.0 | 35.0 | 37.0 | 41.0 | 37.0 | 39.0 | 36.0 | 38.0 | 39.0 | 41.0 | 40.0 |
| <b>18b</b> | 35.0 | 35.0 | 39.0 | 38.0 | 38.0 | 40.0 | 39.0 | 38.0 | 37.0 | 38.0 | 36.0 | 35.0 | 39.0 | 38.0 | 38.0 | 42.0 | 32.0 | 43.0 | 37.0 | 37.0 | 23.0 | 40.0 | 37.0 | 40.0 |
| <b>21b</b> | 49.0 | 49.0 | 50.0 | 50.0 | 50.0 | 50.0 | 49.0 | 49.0 | 49.0 | 39.0 | 40.0 | 40.0 | 46.0 | 46.0 | 49.0 | 48.0 | 50.0 | 53.0 | 45.0 | 39.0 | 49.0 | 50.0 | 53.0 | 50.0 |

**Table S1b.** Cobb angle values (in degrees) of each curve obtained by each observer and in each series of measurements, with the manual method. Xa is the primary curve, and Xb is the secondary or compensating curve of the RX number X (X1 to X21). The first digit of the column descriptors corresponds to the observer and the second to the measurement series (e.g., E21 is equivalent to the first measurement of the “Expert observer” number 2). E, a measurement obtained by the “Expert observer”; N, the measurement from the “Novel observer”.
