# Supplementary material for: Validity and Absolute Reliability of the Cobb Angle in Idiopathic Scoliosis with TraumaMeter Software
Source: Int J Environ Res Public Health. 2022 Apr 12;19(8):4655. doi: 10.3390/ijerph19084655 (PMC9027061; doi:10.3390/ijerph19084655)
Supplement: Supplementary file 1 [file ijerph-19-04655-s001.zip]

Archive with 5 entries (5 files):
- TABLE S1a_TRAUMAMETER & COBB_IJERPH.pdf
- TABLE S1b_TRAUMAMETER & COBB_IJERPH.pdf
- TABLE S2a_TRAUMAMETER & COBB_IJERPH.pdf
- TABLE S2b_TRAUMAMETER & COBB_IJERPH.pdf
- TABLE S2c_TRAUMAMETER & COBB_IJERPH.pdf
